# Supplementary material for: Retrospective analysis of the effect of SGLT-2 inhibitors on renal function in patients with type 2 diabetes in the real world
Source: Frontiers journal article supplement (doi:10.3389/fphar.2024.1376850), 2024-08-05
Supplement: Image_2.pdf [file Image_2.pdf]

(a) LDL-C

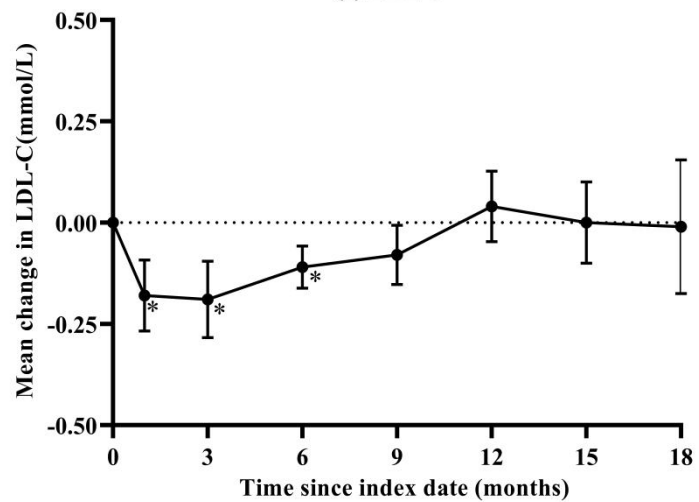

| Months      | 0   | 1  | 3   | 6   | 9   | 12 | 15 | 18 |
|-------------|-----|----|-----|-----|-----|----|----|----|
| Patient No. | 280 | 75 | 189 | 156 | 128 | 86 | 56 | 24 |

(b) TG

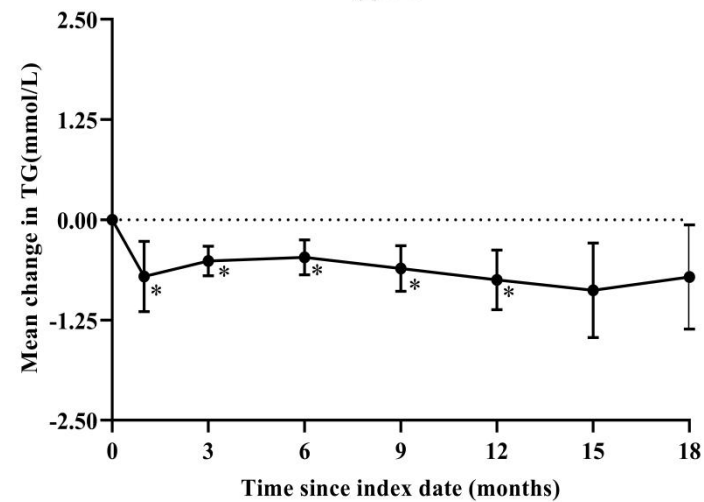

| Months      | 0   | 1  | 3   | 6   | 9   | 12 | 15 | 18 |
|-------------|-----|----|-----|-----|-----|----|----|----|
| Patient No. | 283 | 75 | 192 | 158 | 129 | 87 | 56 | 22 |

(c) TC

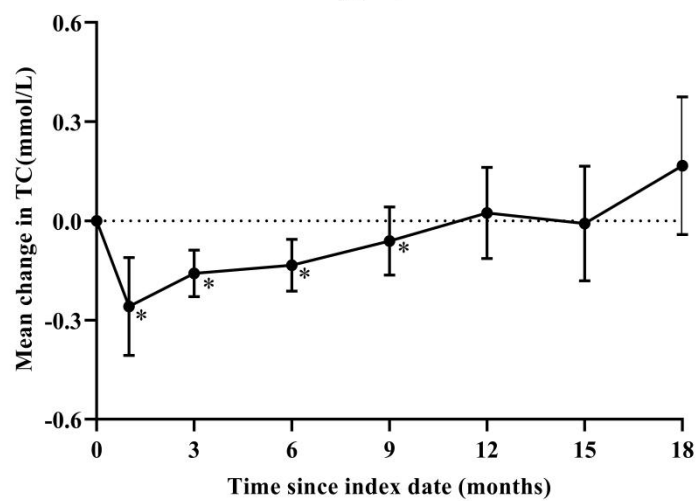

| Months      | 0   | 1  | 3   | 6   | 9   | 12 | 15 | 18 |
|-------------|-----|----|-----|-----|-----|----|----|----|
| Patient No. | 283 | 75 | 191 | 158 | 129 | 87 | 55 | 22 |

(d) HDL-C

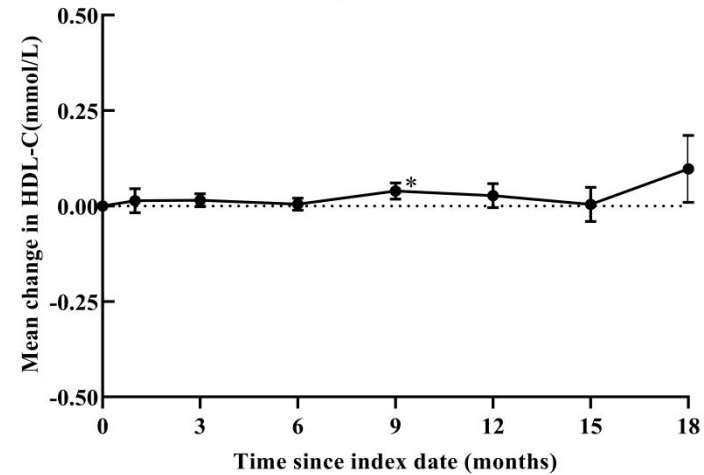

| Months      | 0   | 1  | 3   | 6   | 9   | 12 | 15 | 18 |
|-------------|-----|----|-----|-----|-----|----|----|----|
| Patient No. | 280 | 75 | 189 | 154 | 128 | 86 | 56 | 21 |

Supplemental Figure 2. Change in blood lipid levels over time after SGLT-2 inhibitors treatment: a Low density lipoprotein cholesterol (LDL-C), b Triglyceride(TG), c Total cholesterol(TC), and d High density lipoprotein cholesterol (HDL-C). Means of change were plotted with standard error of mean. The bottom tables present the number observations available at each time point. \*, representing the  $p < 0.05$  in the time point and baseline by paired sample test.
